# Supplementary material for: Broadening the chemical scope of laccases: selective deprotection of N-benzyl groups
Source: Royal Society of Chemistry journal article supplement (doi:10.1039/c5gc00525f), 2015-01-01
Supplement: c5gc00525f1.pdf [file c5gc00525f1.pdf]

## Laccase/TEMPO

### dibenzylcompound

yield: 95%

| Material                           | (Non)volatile [mg] | (Non)volatile [E] | Solvent [mL] |
|------------------------------------|--------------------|-------------------|--------------|
| <u>Starting Materials</u>          |                    |                   |              |
| substrate <b>1a</b>                | 100.0              |                   |              |
| O <sub>2</sub>                     | 12.8               | 0.112             |              |
| laccase from <i>T. versicolor</i>  | 11.6               | 0.176             |              |
| TEMPO                              | 10.6               | 0.161             |              |
| tris buffer                        | 17.4               | 2.642             |              |
| water                              |                    |                   | 7.2          |
| <u>By-Products</u>                 |                    |                   |              |
| Benzaldehyde                       |                    | 0.517             |              |
| Remaining diBenzylcompound + other |                    | 0.080             |              |
| <u>Auxiliaries (work-up)</u>       |                    |                   |              |
| Na <sub>2</sub> SO <sub>4</sub>    | 375.0              | 5.680             |              |
| NaOH                               | 800.0              | 12.117            |              |
| Dichloromethane                    |                    |                   | 30.0         |

|                  |             |
|------------------|-------------|
| <b>E factor:</b> |             |
| reaction         | 3.7         |
| work-up          | 17.8        |
| purification     | <i>na</i>   |
| <b>total</b>     | <b>21.5</b> |

## Hydrogenation

### dibenzylcompound

yield: 27%

| Material                            | (Non)volatile [mg] | (Non)volatile [E] | Solvent [mL] |
|-------------------------------------|--------------------|-------------------|--------------|
| <i>Starting Materials</i>           |                    |                   |              |
| dibenzylcompound                    | 100.0              |                   |              |
| H <sub>2</sub>                      | 0.7                | 0.001             |              |
| Pd/C                                | 3.4                | 0.180             |              |
| MeOH                                |                    |                   | 3.39         |
| <i>By-Products</i>                  |                    |                   |              |
| Toluene                             |                    | 0.449             |              |
| remaining dibenzylcompound + others |                    | 3.917             |              |
| <i>Auxiliaries (work-up)</i>        |                    |                   |              |
| Celite                              | 10700.0            | 569.420           |              |
| Silica gel                          | 10000.0            | 532.169           |              |
| MeOH                                |                    |                   | 10.00        |
| n-Hexane                            |                    |                   | 25.00        |
| EtOAc                               |                    |                   | 225.00       |

| E factor:    |               |
|--------------|---------------|
| reaction     | 4.5           |
| work-up      | 1101.6        |
| purification | <i>na</i>     |
| <b>total</b> | <b>1106.1</b> |

**DIAD****dibenzylcompound**

yield: 80%

| Material                            | (Non)volatile [mg] | (Non)volatile [E] | Solvent [mL] |
|-------------------------------------|--------------------|-------------------|--------------|
| <i><u>Starting Materials</u></i>    |                    |                   |              |
| dibenzylcompound                    | 50.0               |                   |              |
| DIAD                                | 40.0               | 0.234             |              |
| water                               | 36.0               | 0.020             | 2.4          |
| HCl conc (37% aq)                   |                    | 5.320             | 0.1          |
| THF                                 |                    |                   | 2.0          |
| <i><u>By-Products</u></i>           |                    |                   |              |
| Benzaldehyde                        |                    | 0.517             |              |
| DIHD                                |                    | 0.995             |              |
| remaining dibenzylcompound + other  |                    | 0.628             |              |
| <i><u>Auxiliaries (work-up)</u></i> |                    |                   |              |
| NaOH                                | 240.000            | 8.646             |              |
| Na <sub>2</sub> SO <sub>4</sub>     | 125.0              | 4.504             |              |
| Silica gel                          | 100.0              | 360.277           |              |
| CH <sub>2</sub> Cl <sub>2</sub>     |                    |                   | 10.0         |
| n-Hexane                            |                    |                   | 25.0         |
| EtOAc                               |                    |                   | 225.0        |

| E factor:    |              |
|--------------|--------------|
| reaction     | 7.7          |
| work-up      | 373.4        |
| purification | <i>na</i>    |
| <b>total</b> | <b>381.1</b> |
